# Supplementary material
Source: publisher site journal article supplement (https://www.dovepress.com/article/400055)
Supplement: Supplementary file 1 [file get_supplementary_file.php]

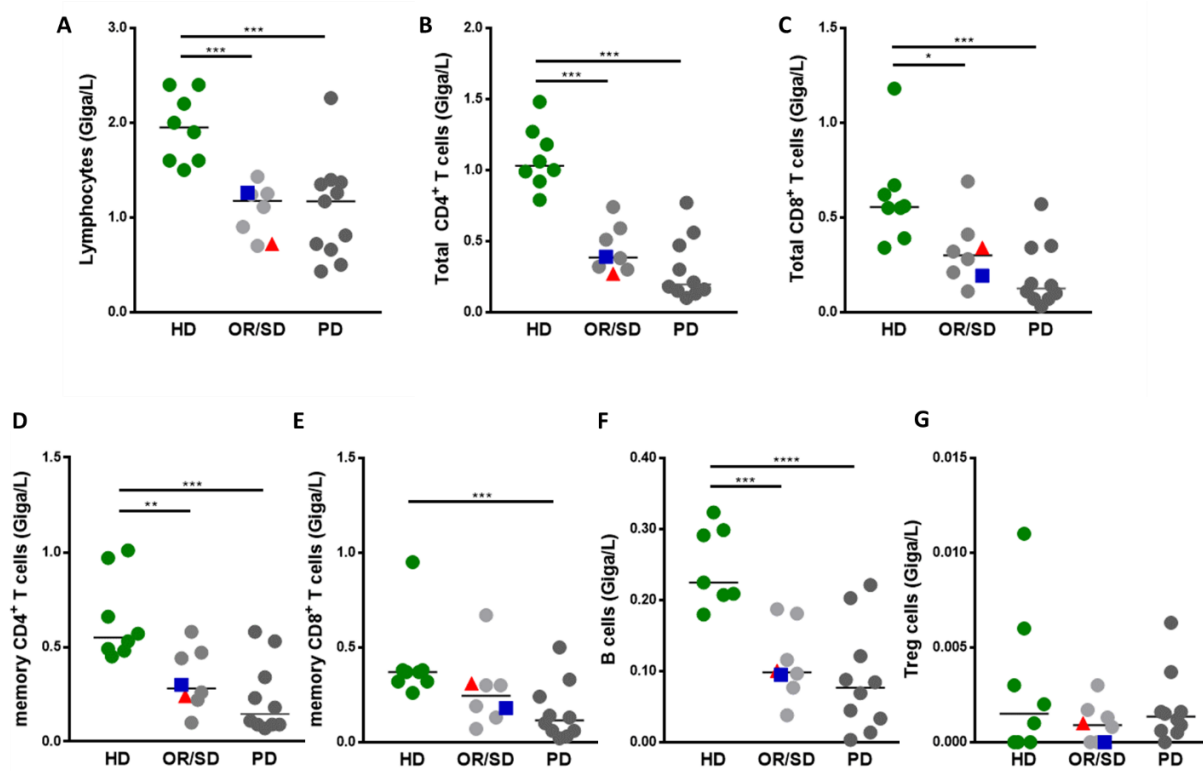

### Supplementary Figure S1: At inclusion, patients present blood T and B cell subsets lymphopenia

At inclusion time, absolute number of total Lymphocytes based on clinical blood counts (A), total CD4<sup>+</sup> (B), total CD8<sup>+</sup> (C), memory CD4<sup>+</sup> (D) and CD8<sup>+</sup> (E) T cells, B cells (F) and Treg cells (G) based on FACS analysis for healthy donors (HD), patients who presented a stable disease or responded (OR/SD) or progressed (PD) during treatment. Patients who responded to treatment were highlighted as blue square for partial responder (PR) (02-003) and red triangle for complete responder (CR) (01-005). Statistical analysis: one-way ANOVA (\* p<0,05; \*\* p<0,005; \*\*\* p<0.001, \*\*\*\* p<10<sup>-4</sup>).

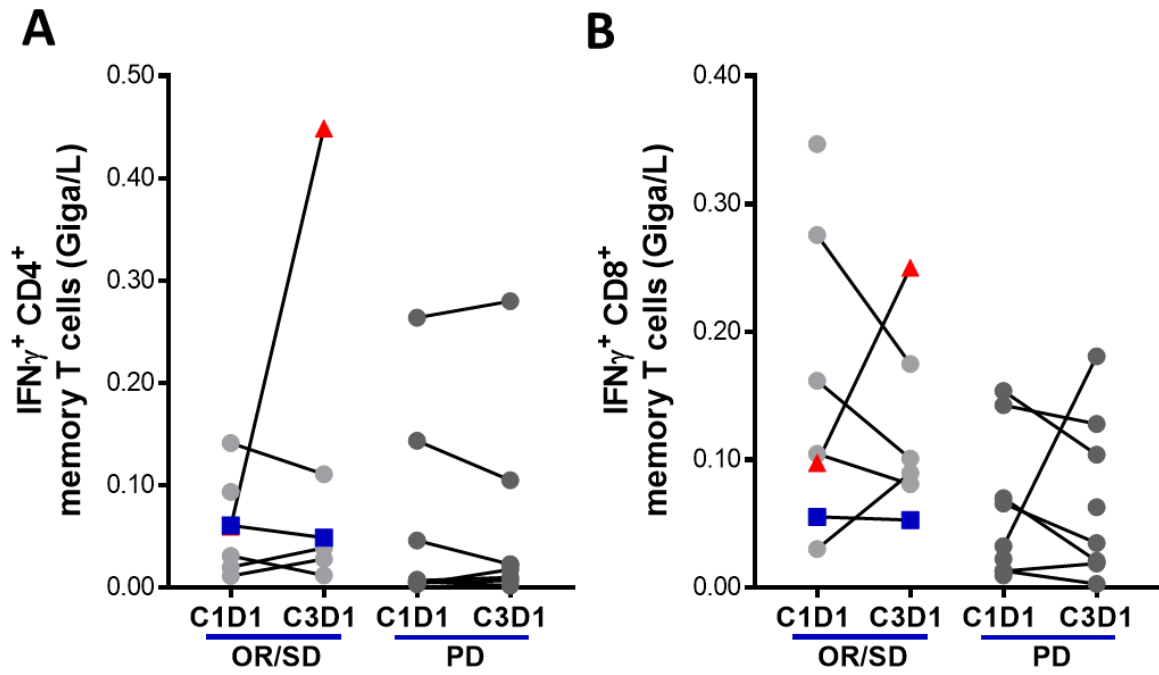

**Supplementary Figure S2: Evolution of the absolute numbers of IFN $\gamma$ -producing CD4<sup>+</sup> and CD8<sup>+</sup> T cells**

Quantification of absolute number of memory CD4<sup>+</sup> (A) and CD8<sup>+</sup> (B) T cells that produce IFN $\gamma$  after PMA ionomycin short term reactivation.

### Supplementary Table 1 – Adverse Events

| No. (%) of patients with at least one | All Grades | Grade ≥2 | Grade ≥3 | Grade ≥4 |
|---------------------------------------|------------|----------|----------|----------|
| AE Related to Pembrolizumab           | 14 (70.0%) | 4        | 3        | 0        |
| AE Related to Cyclophosphamide        | 16 (80.0%) | 11       | 8        | 1        |
| Serious AE                            | 3 (10.0%)  | 1        | 2        | 0        |
| IrAE                                  | 0 (0.0%)   | -        | -        | -        |
| Grade ≥ 2 related AE (Preferred term) |            |          |          |          |
| Lymphocytes count decreased           |            | 11       | 5        | 1*       |
| PAL increase                          |            | 2        | 1        | 0        |
| Abdominal pain                        |            | 1        | 1        | 0        |
| Fatigue                               |            | 1        | 0        | 0        |
| ASAT increase                         |            | 1        | 1        | 0        |
| GGT increase                          |            | 1        | 1        | 0        |
| Cystitis                              |            | 1        | 0        | 0        |
| IRR                                   |            | 1        | 0        | 0        |

AE : adverse events, irAE : immune-related AE, PAL: Phosphatase alkaline, ASAT: **aspartate aminotransferase**, IRR: infusion related reactions, related : to at least one study drug, \* Severe toxicity reported during the safety run
